# Supplementary material
Source: PubMed Central journal article supplement (PMC11580837)
Supplement: ehp14426.s001.acco.pdf [file ehp14426.s001.acco.pdf]

**Note to readers with disabilities:** *EHP* strives to ensure that all journal content is accessible to all readers. However, some figures and Supplemental Material published in *EHP* articles may not conform to [508 standards](#) due to the complexity of the information being presented. If you need assistance accessing journal content, please contact [ehpsubmissions@niehs.nih.gov](mailto:ehpsubmissions@niehs.nih.gov). Our staff will work with you to assess and meet your accessibility needs within 3 working days.

### **Supplemental Material**

#### **Integrated Studies on Male Reproductive Toxicity of Decabromodiphenyl Ethane in Zebrafish Spermatozoa *Ex Vivo*, Male Zebrafish *In Vivo*, and GC-1 Cells *In Vitro***

Lihua Yang, Yindan Zhang, Jianguan Hua, Guili Song, Fan Li, Na Zheng, Taotao Zhang, Zhixiang Xu, Xinxin Ren, Biran Zhu, Yanna Han, Yongyong Guo, Jian Han, and Bingsheng Zhou

#### **Table of Contents**

**Figure S1.** Effects of *ex vivo* exposure of DBDPE on zebrafish spermatozoa motility in the pre-experiment. (A) Total motility (TM, %) of spermatozoa. (B) Progressive motility (PM, %) of spermatozoa. (C) Average path velocity (VAP,  $\mu\text{m/s}$ ) of spermatozoa. (D) Straight line velocity (VSL,  $\mu\text{m/s}$ ) of spermatozoa. (E) Curvilinear velocity (VCL,  $\mu\text{m/s}$ ) of spermatozoa. (F) Linearity (LIN, %) of spermatozoa. Data represented as the means  $\pm$  standard error of the mean (SEM) ( $n = 33-36$ ).  $*P < 0.05$  and  $**P < 0.01$  indicate significant differences between the exposure groups and the control group by one-way analysis of variance (ANOVA) followed by the post hoc least significant difference (LSD) test. “ns” indicates no significant difference between blank control and solvent control (0.05% DMSO) groups. Data are reported in Excel Table S10.

**Figure S2.** Effects of *ex vivo* exposure to DBDPE on zebrafish spermatozoa motility and hatching rate of embryos by artificial fertilization. (A) Average path velocity (VAP,  $\mu\text{m/s}$ ) of zebrafish spermatozoa. (B) Straight line velocity (VSL,  $\mu\text{m/s}$ ) of zebrafish spermatozoa. (C) Curvilinear velocity (VCL,  $\mu\text{m/s}$ ) of zebrafish spermatozoa ( $n = 30-41$ ). (D) Hatching rate determined at 72 h post hatching of zebrafish embryos derived by artificial fertilization ( $n = 9$ ). Data represented as the means  $\pm$  standard error of the mean (SEM). No statistical significance was observed in all the DBDPE-exposed group compared to the control, by one-way analysis of variance (ANOVA) followed by the post hoc least significant difference (LSD) test. Data are reported in Excel Table S11.

**Figure S3.** Effects of DBDPE *in vivo* exposure on different parameters of reproductive behavior in male zebrafish. (A) Cumulative mating duration. (B) Mating rate. (C) Mating frequency. (D) Cumulative body contact duration. (E) Body contact rate. (F) Body contact frequency.  $n = 19-21$ . Data represented as the means  $\pm$  standard error of the mean (SEM). No statistical significance was observed in all the DBDPE-exposed group compared to the control, by one-way analysis of variance (ANOVA) followed by the post hoc least significant difference (LSD) test. Data are reported in Excel Table S12.

**Figure S4.** Area ratio of interstitial space/whole testicular section in male zebrafish testes after 2-month *in vivo* exposure to DBDPE. Data represented as the means  $\pm$  standard error of the mean (SEM),  $n = 7-9$ . No statistical significance was observed in all the DBDPE-exposed group compared to the control, by one-way analysis of variance (ANOVA) followed by the post hoc least significant difference (LSD) test.  $P = 0.843, 0.149, 0.056, 0.116$  in 0.1, 1, 10, 100 nM DBDPE exposure group, respectively. See Excel Table S13 for summary data.

**Figure S5.** Whole proteome and phosphoproteome male in male zebrafish testes after exposure to 100 nM DBDPE. (A) Distribution of the phosphorylated serine, threonine, and tyrosine residues among the identified phosphorylation sites in the phosphoproteome. (B) Numbers and percentages of up-regulated and down-regulated proteins, and those that did not significantly differ in 100 nM DBDPE treated zebrafish testes relative to the control. (C) Numbers and percentages of up-regulated and down-regulated phospho-proteins and those that did not significantly differ in 100 nM DBDPE treated zebrafish testes relative to the control. (D) GO enrichment analysis of DEPs. (E) GO enrichment analysis of proteins harboring differentially phosphorylated sites. See Excel Table S14 for summary data.

**Figure S6.** The relative mRNA expression levels of target genes in testes of zebrafish exposed to lower concentrations of DBDPE (0, 0.1, 1, 10 nM) for two months ( $n = 3$  in each group). Data were represented as the means  $\pm$  standard error of the mean (SEM).  $*P < 0.05$ ,  $**P < 0.01$  and  $***P < 0.001$  indicate significant differences between the exposure groups and the control group by one-way analysis of variance (ANOVA) followed by the post hoc least significant difference (LSD) test. Red and blue colors indicate upregulation and downregulation of target genes in exposed zebrafish testes relative to control, respectively. Color intensity is proportional to  $\log_2(\text{fold change})$ . The values in each box indicate  $\log_2(\text{fold change})$  of mRNA expression levels of target genes relative to control. See Excel Table S15 for summary data.

**Figure S7.** Primary investigation on the effects of DBDPE on MMP and ATP contents in GC-1 cells by setting a series of concentrations *in vitro*. (A) Mitochondrial membrane potential (MMP) of GC-1 cells following exposure to 0.01-10  $\mu\text{M}$  DBDPE for 48 h ( $n = 4-5$ ). (B) ATP contents of GC-1 cells following exposure to 0.01-10  $\mu\text{M}$  DBDPE for 48 h ( $n = 3$ ). Data were represented as the means  $\pm$  standard error of the mean (SEM).  $*P < 0.05$  indicates significant differences between the exposure groups and the control group. Data are reported in Excel Table S10.

**Figure S8.** Correlation analysis of the investigated parameters in GC-1 cells between the 1  $\mu$ M DBDPE exposure group and the oxamate exposure group. For most of the investigated parameters were significantly changed in 1  $\mu$ M DBDPE exposure group and oxamate exposure group, with similar change trends observed. A pearson correlation analysis were conducted to further figure out their changing relationship. “*R*” and “*P*” indicate the correlation coefficient and the significant difference, respectively; their values are shown in the figure. Red and blue colour represent positive and negative correlation, respectively.

**Table S1.** The measured sperm motility parameters and accompanying definitions in this study.

**Table S2.** CASA input parameters for zebrafish.

**Table S3.** Detailed informations of primers for qRT-PCR used in the present study.

**Table S4.** DBDPE contents detected in zebrafish testes.

**Table S5.** Basic developmental parameters of exposed male fish and F1 offspring larvae.

**Additional File-** Excel Document

## Supplementary figures

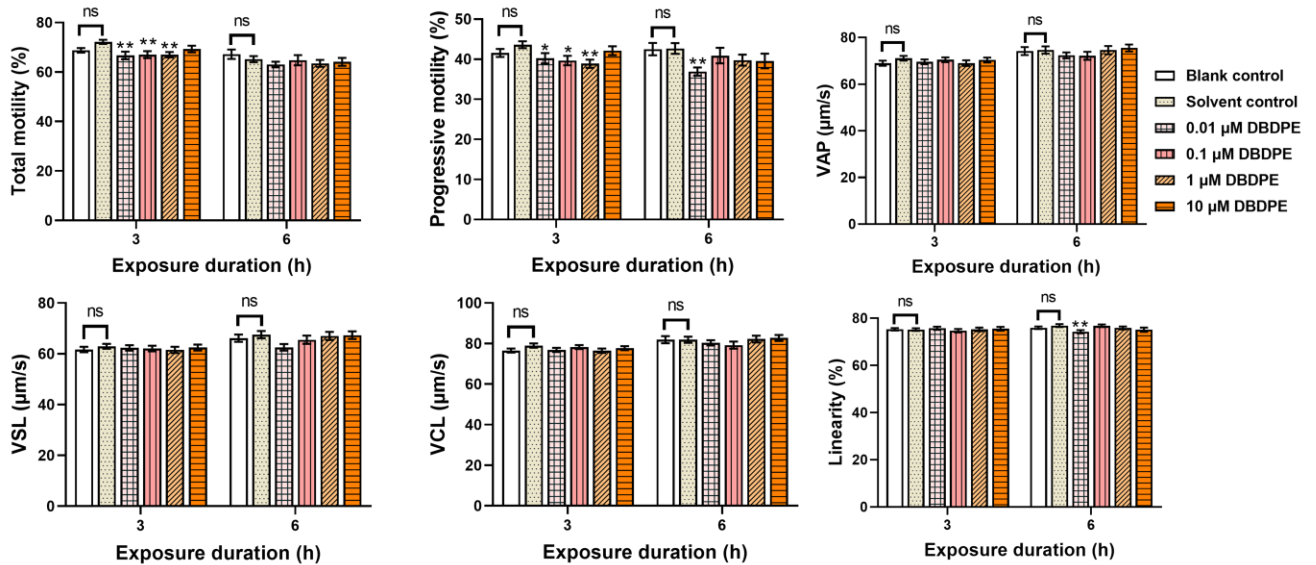

**Figure S1.** Effects of *ex vivo* exposure of DBDPE on zebrafish spermatozoa motility in the pre-experiment. (A) Total motility (TM, %) of spermatozoa. (B) Progressive motility (PM, %) of spermatozoa. (C) Average path velocity (VAP,  $\mu\text{m/s}$ ) of spermatozoa. (D) Straight line velocity (VSL,  $\mu\text{m/s}$ ) of spermatozoa. (E) Curvilinear velocity (VCL,  $\mu\text{m/s}$ ) of spermatozoa. (F) Linearity (LIN, %) of spermatozoa. Data represented as the means  $\pm$  standard error of the mean (SEM) ( $n = 33-36$ ). \* $P < 0.05$  and \*\* $P < 0.01$  indicate significant differences between the exposure groups and the control group by one-way analysis of variance (ANOVA) followed by the post hoc least significant difference (LSD) test. “ns” indicates no significant difference between blank control and solvent control (0.05% DMSO) groups. Data are reported in Excel Table S10.

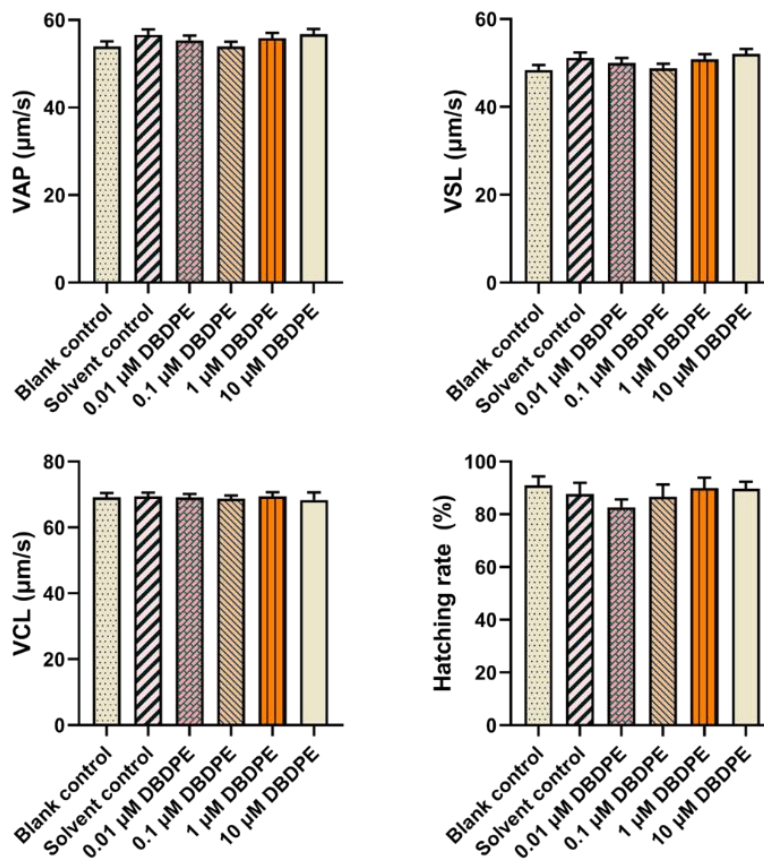

**Figure S2.** Effects of *ex vivo* exposure to DBDPE on zebrafish spermatozoa motility and hatching rate of embryos by artificial fertilization. (A) Average path velocity (VAP,  $\mu\text{m/s}$ ) of zebrafish spermatozoa. (B) Straight line velocity (VSL,  $\mu\text{m/s}$ ) of zebrafish spermatozoa. (C) Curvilinear velocity (VCL,  $\mu\text{m/s}$ ) of zebrafish spermatozoa ( $n = 30\text{--}41$ ). (D) Hatching rate determined at 72 h post hatching of zebrafish embryos derived by artificial fertilization ( $n = 9$ ). Data represented as the means  $\pm$  standard error of the mean (SEM). No statistical significance was observed in all the DBDPE-exposed group compared to the control, by one-way analysis of variance (ANOVA) followed by the post hoc least significant difference (LSD) test. Data are reported in Excel Table S11.

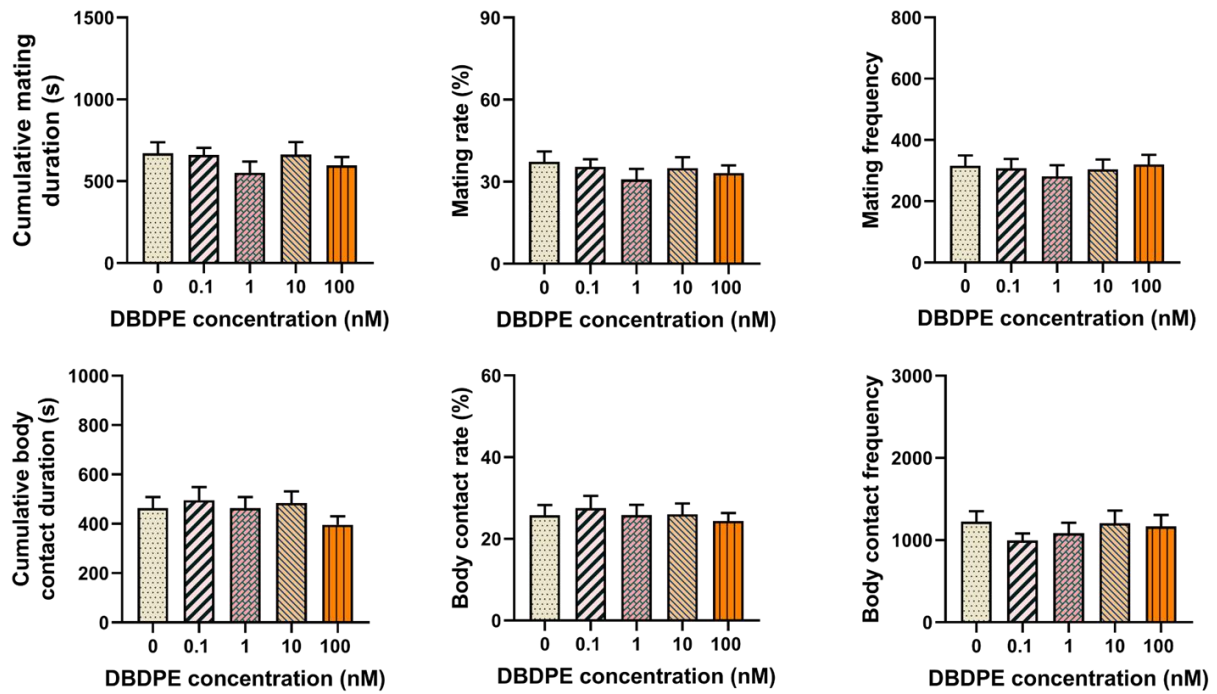

**Figure S3.** Effects of DBDPE *in vivo* exposure on different parameters of reproductive behavior in male zebrafish. (A) Cumulative mating duration. (B) Mating rate. (C) Mating frequency. (D) Cumulative body contact duration. (E) Body contact rate. (F) Body contact frequency.  $n = 19-21$ . Data represented as the means  $\pm$  standard error of the mean (SEM). No statistical significance was observed in all the DBDPE-exposed group compared to the control, by one-way analysis of variance (ANOVA) followed by the post hoc least significant difference (LSD) test. Data are reported in Excel Table S12.

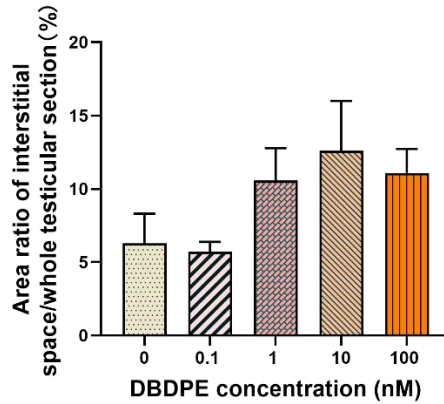

**Figure S4.** Area ratio of interstitial space/whole testicular section in male zebrafish testes after 2-month *in vivo* exposure to DBDPE. Data represented as the means  $\pm$  standard error of the mean (SEM),  $n = 7-9$ . No statistical significance was observed in all the DBDPE-exposed group compared to the control, by one-way analysis of variance (ANOVA) followed by the post hoc least significant difference (LSD) test.  $P = 0.843, 0.149, 0.056, 0.116$  in 0.1, 1, 10, 100 nM DBDPE exposure group, respectively. See Excel Table S13 for summary data.

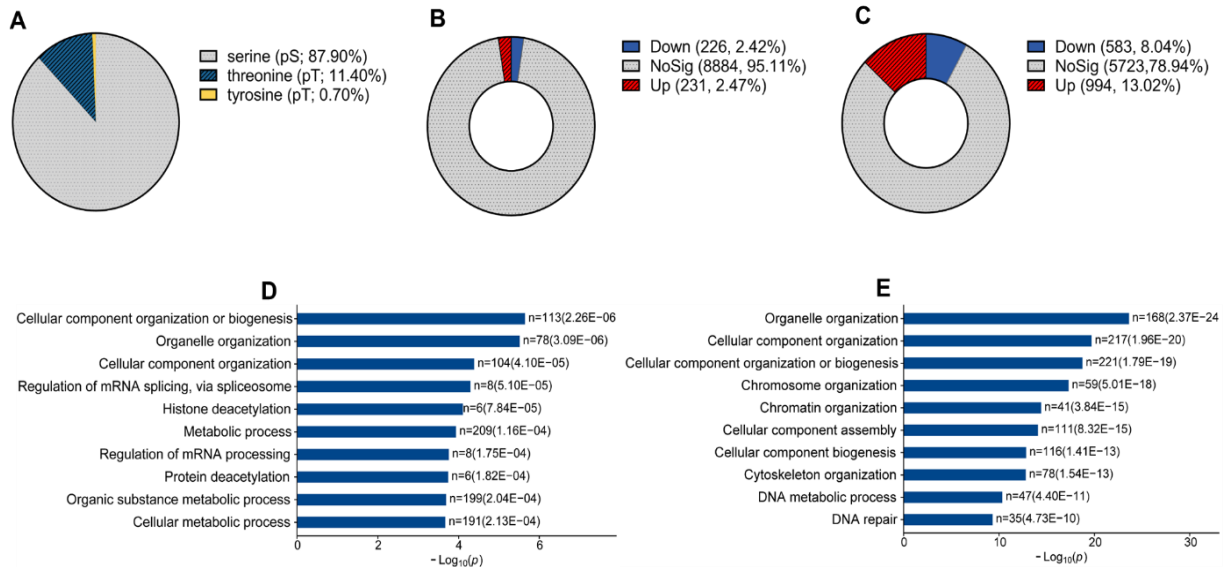

**Figure S5.** Whole proteome and phosphoproteome male in male zebrafish testes after exposure to 100 nM DBDPE. (A) Distribution of the phosphorylated serine, threonine, and tyrosine residues among the identified phosphorylation sites in the phosphoproteome. (B) Numbers and percentages of up-regulated and down-regulated proteins, and those that did not significantly differ in 100 nM DBDPE treated zebrafish testes relative to the control. (C) Numbers and percentages of up-regulated and down-regulated phospho-proteins and those that did not significantly differ in 100 nM DBDPE treated zebrafish testes relative to the control. (D) GO enrichment analysis of DEPs. (E) GO enrichment analysis of proteins harboring differentially phosphorylated sites. See Excel Table S14 for summary data.

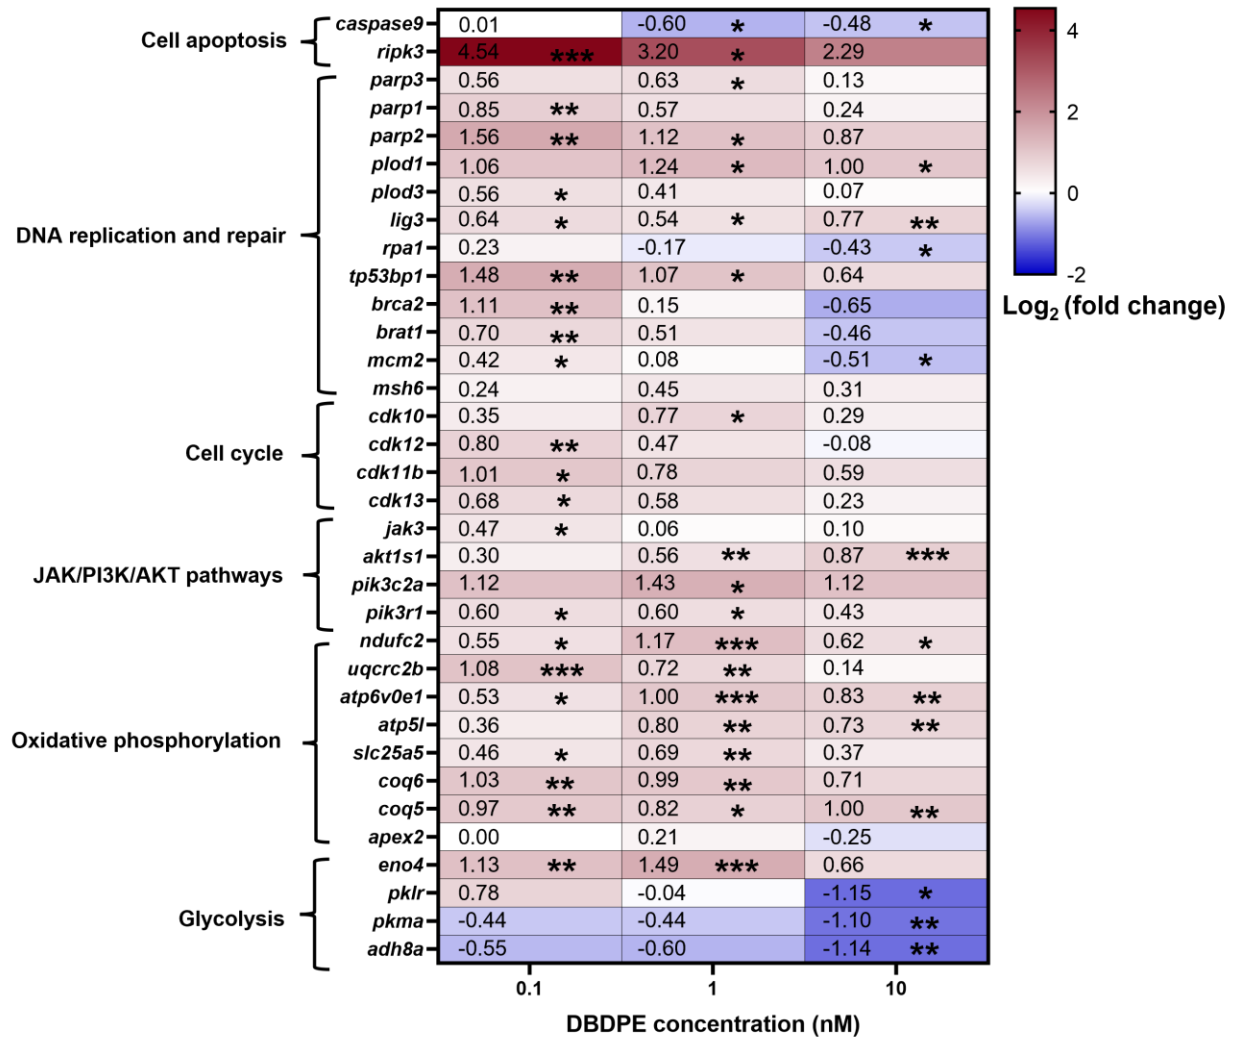

Figure S6. The relative mRNA expression levels of target genes in testes of zebrafish exposed to lower concentrations of DBDPE (0, 0.1, 1, 10 nM) for two months ( $n = 3$  in each group). Data were represented as the means  $\pm$  standard error of the mean (SEM). \* $P < 0.05$ , \*\* $P < 0.01$  and \*\*\* $P < 0.001$  indicate significant differences between the exposure groups and the control group by one-way analysis of variance (ANOVA) followed by the post hoc least significant difference (LSD) test. Red and blue colors indicate upregulation and downregulation of target genes in exposed zebrafish testes relative to control, respectively. Color intensity is proportional to  $\log_2(\text{fold change})$ . The values in each box indicate  $\log_2(\text{fold change})$  of mRNA expression levels of target genes relative to control. See Excel Table S15 for summary data.



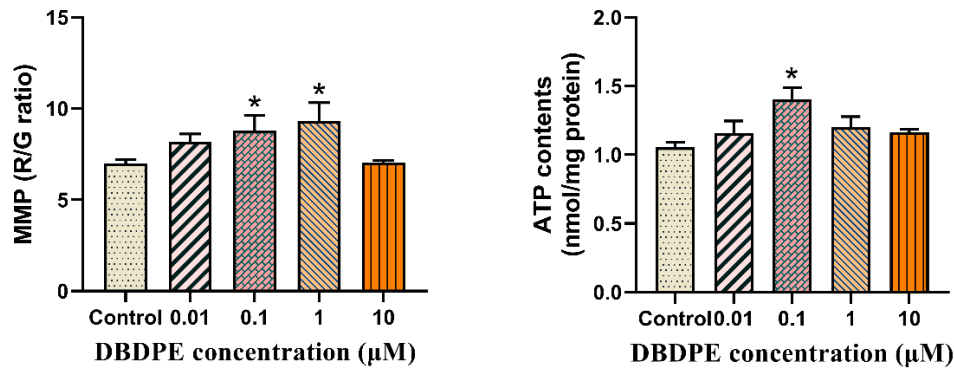

**Figure S7.** Primary investigation on the effects of DBDPE on MMP and ATP contents in GC-1 cells by setting a series of concentrations *in vitro*. (A) Mitochondrial membrane potential (MMP) of GC-1 cells following exposure to 0.01-10 μM DBDPE for 48 h ( $n = 4-5$ ). (B) ATP contents of GC-1 cells following exposure to 0.01-10 μM DBDPE for 48 h ( $n = 3$ ). Data were represented as the means  $\pm$  standard error of the mean (SEM). \* $P < 0.05$  indicates significant differences between the exposure groups and the control group. Data are reported in Excel Table S10

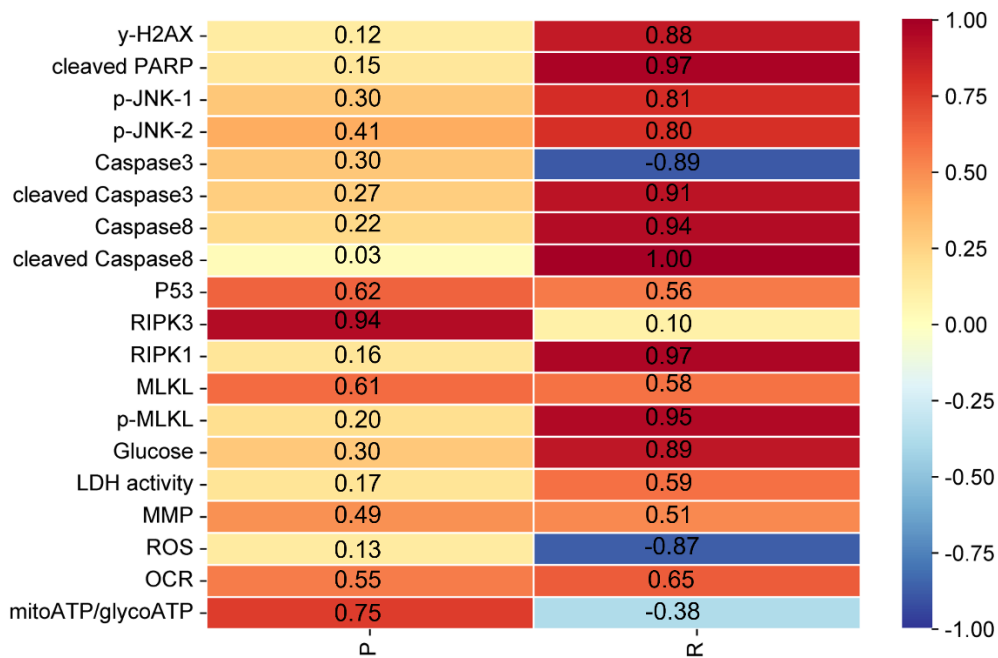

**Figure S8.** Correlation analysis of the investigated parameters in GC-1 cells between the 1 μM DBDPE exposure group and the oxamate exposure group. For most of the investigated parameters were significantly changed in 1 μM DBDPE exposure group and oxamate exposure group, with similar change trends observed. A Pearson correlation analysis was conducted to further figure out their changing relationship. “R” and “P” indicate the correlation coefficient and the significant difference, respectively; their values are shown in the figure. Red and blue colour represent positive and negative correlation, respectively.

## Supplementary Tables

**Table S1. The measured sperm motility parameters and accompanying definitions in this study.**

| Parameters                   | Unit            | Definition                                                                                                                                                         |
|------------------------------|-----------------|--------------------------------------------------------------------------------------------------------------------------------------------------------------------|
| Total motility (TM)          | %               | Percentage of sperms that are moving actively either linearly or in a large circle regardless of speed.                                                            |
| Progressive motility (PM)    | %               | Percentage of motile sperms that expressed vigorous swimming.                                                                                                      |
| Average path velocity (VAP)  | $\mu\text{m/s}$ | The average point-to-point velocity of sperm along its average path.                                                                                               |
| Straight line velocity (VSL) | $\mu\text{m/s}$ | The average point-to-point velocity along the straight line between its first and last detected position.                                                          |
| Curvilinear velocity (VCL)   | $\mu\text{m/s}$ | The average point-to-point (total distance traveled) velocity of sperm along its track.                                                                            |
| Linearity (LIN)              | %               | The ratio of VSL/VCL describes path curvature. Percentage linearity of the sperm path, calculated by the departure of the actual sperm track from a straight line. |

**Table S2. CASA input parameters for zebrafish.**

| Input parameters                            | Input values | Unit            |
|---------------------------------------------|--------------|-----------------|
| Minimum sperm head size                     | 1            | $\mu\text{m}^2$ |
| Maximum sperm head size                     | 100          | $\mu\text{m}^2$ |
| Minimum tail length                         | 8            | $\mu\text{m}$   |
| pixel/ $\mu\text{m}$ ratio                  | 151/100      | -               |
| Maximum tail length                         | 15           | $\mu\text{m}$   |
| Minimum track length                        | 10           | frames          |
| Maximum sperm velocity between frames       | 20           | pixels/frame    |
| Minimum VSL for motile                      | 3            | $\mu\text{m/s}$ |
| Minimum VAP for motile                      | 5            | $\mu\text{m/s}$ |
| Minimum VCL for motile                      | 15           | $\mu\text{m/s}$ |
| Low VAP speed threshold                     | 10           | $\mu\text{m/s}$ |
| Maximum percentage of the path with low VAP | 25           | unitless        |
| High WOB, (percentage of VAP/VCL)           | 80           | unitless        |
| High LIN, (percentage of VSL/VAP)           | 80           | unitless        |
| Minimum frames per second                   | 16           | frames          |

**Table S3. Detailed informations of primers for qRT-PCR used in the present study**

| <b>Gene name</b> | <b>Full name</b>                                      | <b>Primer</b>                                          | <b>Accession number</b> | <b>product size (bp)</b> |
|------------------|-------------------------------------------------------|--------------------------------------------------------|-------------------------|--------------------------|
| <i>rpl8</i>      | ribosomal protein L8                                  | F: TTGTTGGTGTGTTGCTGGT<br>R: GGATGCTCAACAGGGTTCAT      | XM_005167684.1          | 136                      |
| <i>caspase9</i>  | apoptosis-related cysteine peptidase                  | F: CTGGAAACTCTTGTGAGAATGG<br>R: TTCAATGCCTTGACGAGGTTTA | NM_001007404.2          | 80                       |
| <i>ripk3</i>     | receptor-interacting serine-threonine kinase 3        | F: TTGTCCCGAGTGGCTGAAAA<br>R: ACGGCTCCTTCCCAGTGATA     | XM_001343791.5          | 181                      |
| <i>parp1</i>     | poly (ADP-ribose) polymerase 1                        | F: GACTCACAGGACGACAAGC<br>R: GACTTTGCCATCAAACATGGG     | NM_001044942.1          | 141                      |
| <i>parp2</i>     | poly (ADP-ribose) polymerase 2                        | F: CTTCAGAGGCGAAGACGGTT<br>R: TCAAAGCATTCCCTTCATTCAGAT | NM_001204270.1          | 246                      |
| <i>parp3</i>     | poly (ADP-ribose) polymerase family, member 3         | F: AAGCTGCTTTGGCATGGAAC<br>R: GTTTGATGGACGCACATAGCC    | NM_200501.1             | 153                      |
| <i>pold1</i>     | polymerase (DNA directed), delta 1, catalytic subunit | F: CTCCTCCCCTTCGTTCCAC<br>R: CATATACGCCGCAACTCCCT      | NM_001039810.2          | 466                      |
| <i>pold3</i>     | polymerase (DNA-directed), delta 3, accessory subunit | F: AGTGCTATACGGTGTGCTGC<br>R: TTGGAGGTAGCAGCAGGTTC     | NM_001042769.2          | 134                      |
| <i>lig3</i>      | ligase III, DNA, ATP-dependent                        | F: AGCAAAGGCTGCGAAAACAG<br>R: CCTAGCGTGTGTGGCTAA       | NM_001030174.2          | 300                      |
| <i>rpa1</i>      | replication protein A1                                | F: CAGCTCAATCCCATGGCTGA<br>R: GGTGCCTTTGACTGACCCTC     | NM_199811.2             | 197                      |
| <i>tp53bp1</i>   | tumor protein p53 binding protein, 1                  | F: CTAACCCTGTGCGATCCTTATG<br>R: AGGCTGAGAGTCCTCAACTAT  | NM_001080170.1          | 100                      |
| <i>brca2</i>     | BRCA2 DNA repair associated                           | F: GGCTTGCTTACAGAGGGACA<br>R: CAACCATCTGGAGACACCTCA    | NM_001110394.2          | 144                      |
| <i>brat1</i>     | BRCA1-associated ATM activator 1                      | F: GATCAACTTGCTGGAGGAGGC<br>R: CACTGCATACGGACAGCAGG    | NM_001040305.1          | 259                      |
| <i>mcm2</i>      | minichromosome maintenance complex component 2        | F: CAGATGGACCAGGACAAAGT<br>R: ACGCACAGTAATCGGGATA      | NM_173257.2             | 87                       |

|                 |                                                                                |                                                        |                |     |
|-----------------|--------------------------------------------------------------------------------|--------------------------------------------------------|----------------|-----|
| <i>msh6</i>     | mutS homolog 6                                                                 | F: GGGAGGCAAATCCACTCTAATG<br>R: GACTCGATCCACAGGAGTAAGA | NM_182860.1    | 109 |
| <i>cdk10</i>    | cyclin dependent kinase 10                                                     | F: TCACGGAGTTTCCACCTCCT<br>R: TATCGCGTGTCTCGGTACAC     | NM_001017622.2 | 289 |
| <i>cdk12</i>    | cyclin dependent kinase 12                                                     | F: ACTGCAGGGACAGTCCAAAG<br>R: CCAGTCGGTTTGAGTCTGCT     | XM_003200531.5 | 263 |
| <i>cdk11b</i>   | cyclin dependent kinase 11B                                                    | F: CCCGCACGAAAGACAAAGAG<br>R: GCTCCAGACGATCCCTCTCTC    | NM_001008646.1 | 150 |
| <i>cdk13</i>    | cyclin dependent kinase 13                                                     | F: AGTGCTCCAACATCCTGCTC<br>R: GCTGCCGAGATACGACTTA      | NM_001366829.1 | 281 |
| <i>jak3</i>     | Janus kinase 3                                                                 | F: AACAGAGCGAGCAGCAGAGAG<br>R: GTGTGACCACCCTTCCTTCC    | XM_002663087.6 | 177 |
| <i>akt1s1</i>   | AKT1 substrate 1                                                               | F: TCGGCAGGTGTCTTCTCAAT<br>R: ACCCATTGCCATACCACGAG     | XM_687419.9    | 141 |
| <i>pik3r4</i>   | phosphoinositide-3-kinase, regulatory subunit 4                                | F: AAGAGAGCTCGCAAACATACGA<br>R: CCACTGTCTGGAATCGTCGAG  | XM_005158299.4 | 119 |
| <i>pik3c2a</i>  | phosphatidylinositol-4-phosphate 3-kinase, catalytic subunit type 2 alpha      | F: CTCCAGCAGGAAGTACGTT<br>R: TGTTTGCCTGTTGGATTGG       | XM_005159305.4 | 368 |
| <i>ndufc2</i>   | NADH:ubiquinone oxidoreductase subunit C2                                      | F: TCCGCCTAAACATTGCCCTT<br>R: GACGATGAACACCGGCTTTG     | NM_001013517.1 | 239 |
| <i>uqcrc2b</i>  | ubiquinol-cytochrome c reductase core protein 2b                               | F: GACCTCACGGGAAGGGTGAA<br>R: TCAGTGTGCTGGTGCTGCTG     | NM_001001589.1 | 117 |
| <i>atp6v0e1</i> | ATPase H <sup>+</sup> transporting V0 subunit e1                               | F: TCCAGCGTCACATGATCGTC<br>R: CATCGTCACAATCACCCCGC     | NM_001006038.2 | 215 |
| <i>atp5l</i>    | ATP synthase, H <sup>+</sup> transporting, mitochondrial F0 complex, subunit g | F: TCGTGGCTAAAGTGCCAACA<br>R: TCCTCACAGCATCCCTGACT     | NM_199757.1    | 204 |
| <i>slc25a5</i>  | solute carrier family 25 member 5                                              | F: CATCATTTACAGAGCTGCCTAC<br>R: TTTACGTCCAGACTGCATCATC | NM_173247.1    | 184 |
| <i>coq5</i>     | coenzyme Q5, methyltransferase                                                 | F: ACCCACATCGAGCAAGCTTTA<br>R: TACTGGACGCGGAAGAAACC    | NM_001004541.1 | 266 |
| <i>coq6</i>     | coenzyme Q6 monooxygenase                                                      | F: CGACCAGGATTCCAGCACTT<br>R: CCAAGCACCAAGACCACTCA     | NM_001045404.1 | 241 |
| <i>apex2</i>    | APEX nuclease (apurinic/aprimidinic endonuclease) 2                            | F: TGAACACCTCTCACAGACCC<br>R: ATCCAGCCACTTTCTCCCAG     | NM_200146.1    | 86  |

|              |                          |                                                      |                |     |
|--------------|--------------------------|------------------------------------------------------|----------------|-----|
| <i>eno4</i>  | enolase 4                | F: CCCGAGCCATAGCAAAGTGT<br>R: CACCGCACACCATCTTTTCC   | NM_001077547.1 | 299 |
| <i>pklr</i>  | pyruvate kinase L/R      | F: AGAAACAGCCAAAGGACA<br>R: ACGAGGACGATAACGAGA       | NM_201289.1    | 253 |
| <i>pkma</i>  | pyruvate kinase M1/2a    | F: GTCCGCACACAGCACATGATTG<br>R: GGGTCACGGGTCAGAACAGA | NM_199333.1    | 101 |
| <i>adh8a</i> | alcohol dehydrogenase 8a | F: CGAGTACACCGTCATCAAC<br>R: AGCACCGAGTCCGAATAC      | NM_001001946   | 166 |

---

**Table S4. DBDPE contents detected in zebrafish testes.**

| Nominal concentrations<br>(nM) | Measured concentrations (ng/g lw) |         |
|--------------------------------|-----------------------------------|---------|
|                                | Mean $\pm$ SEM                    | Median  |
| 0                              | < LOD                             | < LOD   |
| 0.1                            | 870.84 $\pm$ 98.45                | 957.98  |
| 1                              | 1284.2 $\pm$ 482.54               | 1197.51 |
| 10                             | 1410.83 $\pm$ 29.09               | 1480.83 |
| 100                            | 3252.30 $\pm$ 219.40              | 3288.56 |

Note: LOD, limit of detection.

**Table S5. Basic developmental parameters of exposed male fish and F1 offspring larvae.**

| Parameters        | DBDPE concentration (nM)       |                  |                  |                   |                  |                   |
|-------------------|--------------------------------|------------------|------------------|-------------------|------------------|-------------------|
|                   | 0                              | 0.1              | 1                | 10                | 100              |                   |
| Exposed male fish | Body length (cm)               | 2.94 $\pm$ 0.02  | 2.89 $\pm$ 0.02  | 2.97 $\pm$ 0.02   | 2.97 $\pm$ 0.02  | 2.85 $\pm$ 0.02*  |
|                   | Body weight (g)                | 0.38 $\pm$ 0.01  | 0.37 $\pm$ 0.01  | 0.41 $\pm$ 0.01*  | 0.40 $\pm$ 0.01  | 0.36 $\pm$ 0.01   |
|                   | Condition factor (%)           | 1.50 $\pm$ 0.02  | 1.54 $\pm$ 0.02  | 1.53 $\pm$ 0.02   | 1.50 $\pm$ 0.02  | 1.58 $\pm$ 0.02*  |
|                   | Gonado-somatic index (GSI, %)  | 0.88 $\pm$ 0.04  | 0.95 $\pm$ 0.04  | 0.98 $\pm$ 0.05   | 0.97 $\pm$ 0.03  | 1.02 $\pm$ 0.06   |
|                   | Egg production (number/pair)   | 246.6 $\pm$ 51.3 | 349.8 $\pm$ 51.9 | 438.1 $\pm$ 48.3  | 365.9 $\pm$ 55.3 | 338.2 $\pm$ 53.5  |
| F1 embryos        | Fertilization rate (%)         | 91.33 $\pm$ 1.10 | 92.38 $\pm$ 2.71 | 91.21 $\pm$ 1.50  | 94.71 $\pm$ 0.81 | 94.79 $\pm$ 0.87  |
|                   | Hatching rate (72 hpf, %)      | 99.81 $\pm$ 0.19 | 89.00 $\pm$ 4.74 | 81.81 $\pm$ 2.98* | 96.69 $\pm$ 0.74 | 83.78 $\pm$ 2.14* |
|                   | Malformation rate (120 hpf, %) | 0.14 $\pm$ 0.08  | 0.52 $\pm$ 0.23  | 0.13 $\pm$ 0.08   | 0.72 $\pm$ 0.29  | 0.33 $\pm$ 0.25   |
|                   | Survival rate (120 hpf, %)     | 80.84 $\pm$ 1.97 | 86.75 $\pm$ 0.99 | 78.56 $\pm$ 1.62  | 81.00 $\pm$ 0.74 | 79.56 $\pm$ 1.78  |

Note: Data were represented as the means  $\pm$  standard error of the mean (SEM). \* $P$  < 0.05 indicates significant differences between the exposure groups and the control group by one-way analysis of variance (ANOVA) followed by the post hoc least significant difference (LSD) test.
